# Supplementary material for: Inequalities in Children's Experiences of Home Learning during the COVID‐19 Lockdown in England
Source: PubMed Central journal article supplement (PMC7753283; doi:10.1111/1475-5890.12240), 2020-11-30
Supplement: FISC-41-653-s001.pdf [file FISC-41-653-s001.pdf]

## Appendix. Extra tables and figure

Table A1. Means for our survey sample (weighted and unweighted) compared with nationally representative LFS sample

|                                                                                                    | IFS–IoE survey,<br>unweighted | IFS–IoE survey,<br>reweighted | Comparable<br>LFS sample |
|----------------------------------------------------------------------------------------------------|-------------------------------|-------------------------------|--------------------------|
| <b>Family structure</b>                                                                            |                               |                               |                          |
| Single mother                                                                                      | 0.184                         | 0.244                         | 0.222                    |
| Single father                                                                                      | 0.079                         | 0.022                         | 0.017                    |
| Couple                                                                                             | 0.737                         | 0.734                         | 0.761                    |
| <b>Women’s education</b>                                                                           |                               |                               |                          |
| GCSEs or less                                                                                      | 0.265                         | 0.339                         | 0.367                    |
| A levels                                                                                           | 0.310                         | 0.262                         | 0.249                    |
| University degree                                                                                  | 0.425                         | 0.398                         | 0.384                    |
| <b>Men’s education</b>                                                                             |                               |                               |                          |
| GCSEs or less                                                                                      | 0.306                         | 0.376                         | 0.416                    |
| A levels                                                                                           | 0.259                         | 0.230                         | 0.229                    |
| University degree                                                                                  | 0.435                         | 0.393                         | 0.354                    |
| <b>Single mothers’ education</b>                                                                   |                               |                               |                          |
| GCSEs or less                                                                                      | 0.358                         | 0.441                         | 0.495                    |
| A levels                                                                                           | 0.423                         | 0.308                         | 0.272                    |
| University degree                                                                                  | 0.219                         | 0.251                         | 0.233                    |
| <b>Pre-crisis employment</b>                                                                       |                               |                               |                          |
| Women                                                                                              | 0.728                         | 0.752                         | 0.745                    |
| Men                                                                                                | 0.877                         | 0.919                         | 0.935                    |
| Single mothers                                                                                     | 0.732                         | 0.700                         | 0.678                    |
| <b>Women’s pre-crisis earnings</b>                                                                 |                               |                               |                          |
| £0–£9,999                                                                                          | 0.306                         | 0.455                         | 0.476                    |
| £10,000–£24,999                                                                                    | 0.427                         | 0.290                         | 0.285                    |
| £25,000–£39,999                                                                                    | 0.128                         | 0.153                         | 0.151                    |
| £40,000+                                                                                           | 0.139                         | 0.102                         | 0.089                    |
| <b>Men’s pre-crisis earnings</b>                                                                   |                               |                               |                          |
| £0–£9,999                                                                                          | 0.095                         | 0.135                         | 0.131                    |
| £10,000–£24,999                                                                                    | 0.338                         | 0.211                         | 0.206                    |
| £25,000–£39,999                                                                                    | 0.251                         | 0.305                         | 0.301                    |
| £40,000–£59,999                                                                                    | 0.163                         | 0.187                         | 0.188                    |
| £60,000+                                                                                           | 0.153                         | 0.162                         | 0.174                    |
| <b>Single mothers’ pre-crisis earnings</b>                                                         |                               |                               |                          |
| £0–£9,999                                                                                          | 0.300                         | 0.556                         | 0.594                    |
| £10,000–£24,999                                                                                    | 0.521                         | 0.283                         | 0.256                    |
| £25,000–£39,999                                                                                    | 0.084                         | 0.122                         | 0.115                    |
| £40,000+                                                                                           | 0.094                         | 0.039                         | 0.035                    |
| <b>Proportion working pre-crisis in industry where 50%+ of jobs have been locked down</b>          |                               |                               |                          |
| Women                                                                                              | 0.330                         | 0.255                         | 0.231                    |
| Men                                                                                                | 0.331                         | 0.287                         | 0.264                    |
| Single mothers                                                                                     | 0.394                         | 0.323                         | 0.282                    |
| <b>Proportion working pre-crisis in occupation where home working is possible in 0–15% of jobs</b> |                               |                               |                          |
| Women                                                                                              | 0.314                         | 0.327                         | 0.327                    |
| Men                                                                                                | 0.347                         | 0.351                         | 0.362                    |
| Single mothers                                                                                     | 0.351                         | 0.379                         | 0.392                    |

|                                                                                                               | IFS–IoE survey,<br>unweighted | IFS–IoE survey,<br>reweighted | Comparable<br>LFS sample |
|---------------------------------------------------------------------------------------------------------------|-------------------------------|-------------------------------|--------------------------|
| <b><i>Proportion working pre-crisis in occupation where home working is possible in 15.1–75% of jobs</i></b>  |                               |                               |                          |
| Women                                                                                                         | 0.211                         | 0.217                         | 0.237                    |
| Men                                                                                                           | 0.271                         | 0.212                         | 0.192                    |
| Single mothers                                                                                                | 0.228                         | 0.272                         | 0.300                    |
| <b><i>Proportion working pre-crisis in occupation where home working is possible in 75.1–100% of jobs</i></b> |                               |                               |                          |
| Women                                                                                                         | 0.474                         | 0.456                         | 0.436                    |
| Men                                                                                                           | 0.382                         | 0.437                         | 0.445                    |
| Single mothers                                                                                                | 0.421                         | 0.349                         | 0.309                    |
| <b><i>Region</i></b>                                                                                          |                               |                               |                          |
| East Midlands                                                                                                 | 0.079                         | 0.087                         | 0.092                    |
| East of England                                                                                               | 0.071                         | 0.050                         | 0.041                    |
| Greater London                                                                                                | 0.184                         | 0.125                         | 0.118                    |
| North West                                                                                                    | 0.145                         | 0.143                         | 0.136                    |
| North East                                                                                                    | 0.072                         | 0.065                         | 0.061                    |
| South East                                                                                                    | 0.148                         | 0.211                         | 0.235                    |
| South West                                                                                                    | 0.102                         | 0.104                         | 0.097                    |
| West Midlands                                                                                                 | 0.109                         | 0.111                         | 0.107                    |
| Yorkshire and the Humber                                                                                      | 0.091                         | 0.105                         | 0.113                    |

Note: In order to make our analysis representative of the situation in England as a whole, we reweight our sample by key characteristics to ensure that it better matches the distribution of characteristics observed in the LFS. In particular, we reweight on: family structure, women’s education, men’s education, prior (pre-pandemic) employment, women’s 2019 pre-tax earnings, men’s 2019 pre-tax earnings and geographic region. To do this, we pool our data with the LFS sample and use regression analysis to calculate appropriate weights. We truncate our weights at the 10<sup>th</sup> and 90<sup>th</sup> percentiles to prevent our analysis being overly sensitive to a few observations. This table reports the means of the variables in the LFS comparable sample and in our survey sample, before and after being weighted.

Source: Labour Force Survey 2019 and COVID-19 online survey of families with children.

**Figure A1. Children’s and adolescents’ daily activities, 2014–15: one-hour compared with 10-minute intervals**

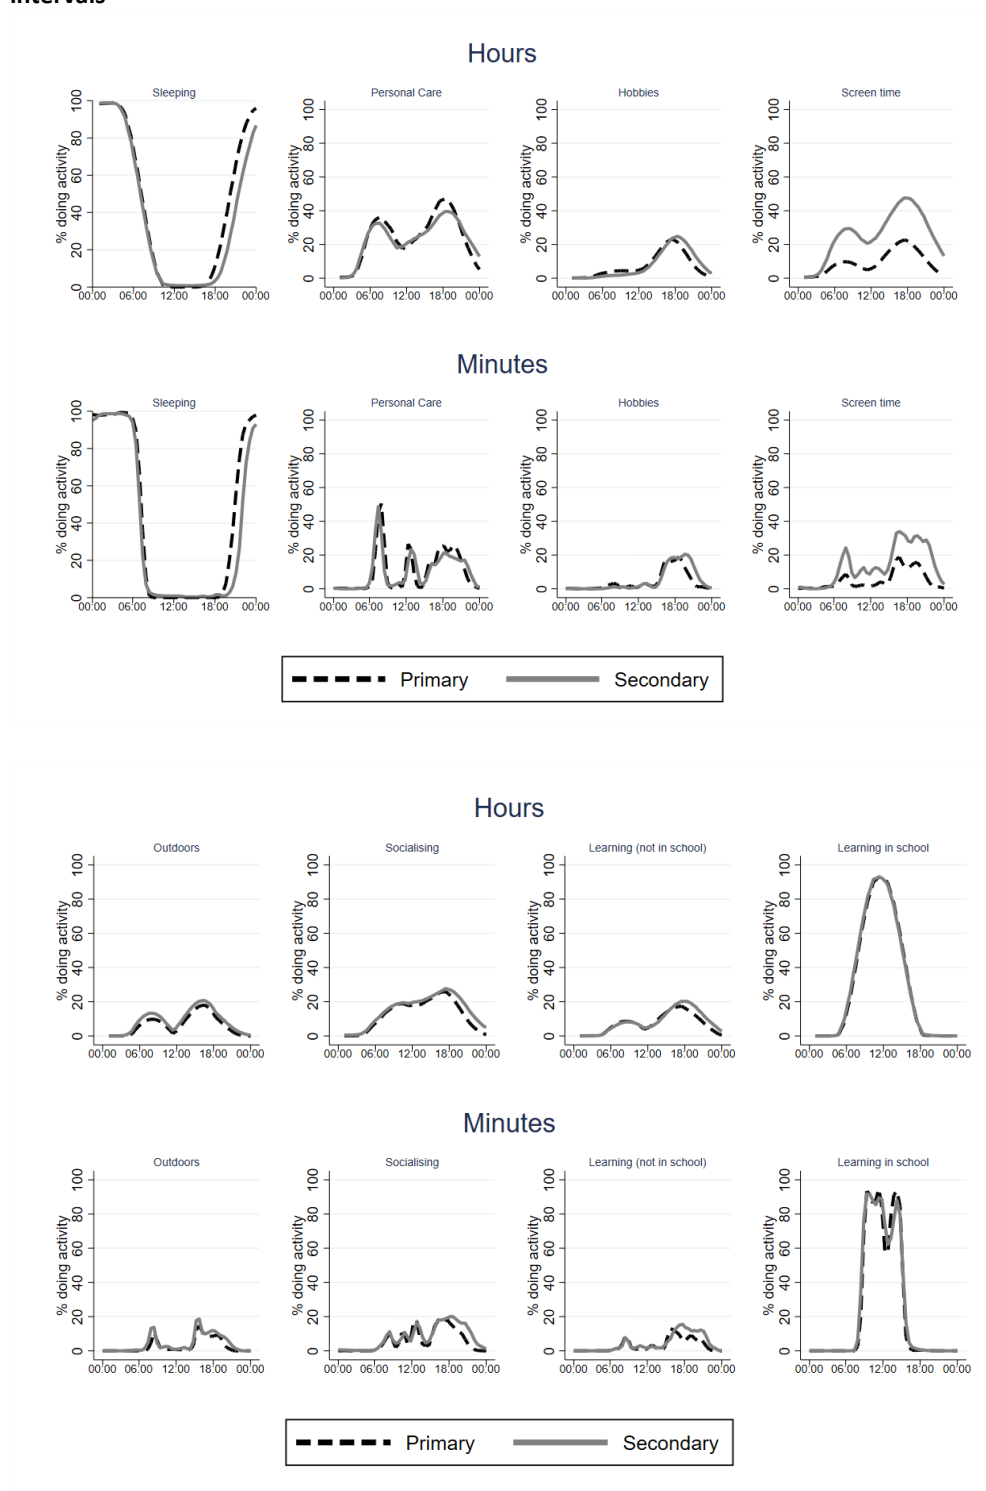

*Note: Lines show the percentage of individuals reporting doing each activity in each hour and each 10-minute slot of the day for the UKTUS (2014–15). All lines are smoothed using Epanechnikov kernels. For the hourly plots, each activity is coded as having taken place if it is recorded to have happened in any 10-minute slot in that hour.*

**Table A2. Different ways of measuring time spent on learning activities on a 'school' day during lockdown**

|                                  | <b>Primary</b> | <b>Secondary</b> | <b>Total</b> |
|----------------------------------|----------------|------------------|--------------|
| One-hour slots (time-diary data) | 4.91           | 4.58             | 4.8          |
| Parental recall of learning time | 4.06           | 4.15             | 4.1          |
